# Supplementary material for: Risk factors for SARS-CoV-2 infection and course of COVID-19 disease in patients with IBD in the Veterans Affair Healthcare System
Source: HighWire-hosted journal article supplement (doi:10.1136/gutjnl-2021-324356), 2021-03-22
Supplement: gutjnl-2021-324356supp001_data_supplement.pdf [file gutjnl-2021-324356supp001_data_supplement.pdf]

**Supplemental Table 1 – International Classification of Diseases (ICD) Codes Used to Identify Inflammatory Bowel Disease**

|                           | <b>ICD-9</b>                                                  | <b>ICD-10</b>                                                                                                                                                                                                                                                                                                                                                                                                                                    |
|---------------------------|---------------------------------------------------------------|--------------------------------------------------------------------------------------------------------------------------------------------------------------------------------------------------------------------------------------------------------------------------------------------------------------------------------------------------------------------------------------------------------------------------------------------------|
| <b>Ulcerative Colitis</b> | 556.0, 556.1, 556.2, 556.3, 556.4, 556.5, 556.6, 556.8, 556.9 | K51.00, K51.011, K51.012, K51.013, K51.014, K51.018, K51.019, K51.20, K51.211, K51.212, K51.213, K51.214, K51.218, K51.219, K51.30, K51.311, K51.312, K51.313, K51.314, K51.318, K51.319, K51.40, K51.411, K51.412, K51.413, K51.414, K51.418, K51.419, K51.50, K51.511, K51.512, K51.513, K51.514, K51.518, K51.519, K51.80, K51.811, K51.812, K51.813, K51.814, K51.818, K51.819, K51.90, K51.911, K51.912, K51.913, K51.914, K51.918, K51.919 |
| <b>Crohn's Disease</b>    | 555.0, 555.1, 555.2, 555.9                                    | K50.00, K50.011, K50.012, K50.013, K50.014, K50.018, K50.019, K50.10, K50.111, K50.112, K50.113, K50.114, K50.118, K50.119, K50.80, K50.811, K50.812, K50.813, K50.814, K50.818, K50.819, K50.90, K50.911, K50.912, K50.913, K50.914, K50.918, K50.919                                                                                                                                                                                           |

**Supplemental Table 2 – Sensitivity Analysis of Mixed-Effects Cox Regression Model for SARS-CoV2 Infection\*† with Relaxed Exclusion Criteria**

| Variable                           | Hazard Ratio | 95% Confidence Interval | p-value |
|------------------------------------|--------------|-------------------------|---------|
| Age (per year)                     | 0.99         | (0.99 - 1.00)           | 0.001   |
| <b>Race</b>                        |              |                         |         |
| White                              | (ref)        |                         |         |
| Black                              | 1.51         | (1.24 - 1.85)           | <0.001  |
| Hispanic                           | 1.23         | (0.86 - 1.75)           | 0.26    |
| Other                              | 1.60         | (1.15 - 2.21)           | 0.005   |
| <b>Diabetes Mellitus</b>           | 1.44         | (1.20 - 1.72)           | <0.001  |
| <b>Peripheral Vascular Disease</b> | 1.78         | (1.32 - 2.39)           | <0.001  |
| <b>Obesity</b>                     | 1.35         | (1.10 - 1.65)           | 0.004   |
| <b>Corticosteroid Use</b>          | 1.60         | (1.23 - 2.08)           | <0.001  |
| <b>IBD Med Category</b>            |              |                         |         |
| 5-ASA                              | (ref)        |                         |         |
| Thiopurine                         | 1.03         | (0.76 - 1.40)           | 0.84    |
| Anti-TNF                           | 1.14         | (0.89 - 1.45)           | 0.31    |
| Anti-TNF + TP                      | 1.24         | (0.85 - 1.79)           | 0.26    |
| Anti-TNF + MTX                     | 0.93         | (0.49 - 1.76)           | 0.82    |
| Vedolizumab                        | 1.70         | (1.16 - 2.48)           | 0.006   |
| No IBD Meds                        | 0.94         | (0.78 - 1.13)           | 0.52    |

\* United States geographic region is treated as a random effect

† The following variables were not retained in final multivariable models on the basis of  $p > 0.05$  or non-minimization of Bayesian Information Criterion in associated models: sex, inflammatory bowel disease diagnosis, hypertension, heart failure, arrhythmia, chronic obstructive pulmonary disease, renal failure

**Supplemental Table 3 – Sensitivity Analysis for Development of SARS-CoV2 Infection using Fine and Gray Competing Risks Regression\***

| <b>Variable</b>                    | <b>Subhazard Ratio</b> | <b>95% Confidence Interval</b> | <b>p-value</b> |
|------------------------------------|------------------------|--------------------------------|----------------|
| <b>Age (per year)</b>              | 0.99                   | (0.99 - 1.00)                  | 0.001          |
| <b>Race</b>                        |                        |                                |                |
| White                              | (ref)                  |                                |                |
| Black                              | 1.47                   | (1.20 - 1.81)                  | <0.001         |
| Hispanic                           | 1.21                   | (0.85 - 1.71)                  | 0.29           |
| Other                              | 1.50                   | (1.07 - 2.10)                  | 0.02           |
| <b>Diabetes Mellitus</b>           | 1.43                   | (1.19 - 1.73)                  | <0.001         |
| <b>Peripheral Vascular Disease</b> | 1.70                   | (1.26 - 2.31)                  | 0.001          |
| <b>Obesity</b>                     | 1.30                   | (1.05 - 1.61)                  | 0.02           |
| <b>Corticosteroid Use</b>          | 1.56                   | (1.19 - 2.03)                  | 0.001          |
| <b>IBD Med Category</b>            |                        |                                |                |
| 5-ASA alone                        | (ref)                  |                                |                |
| Thiopurine                         | 1.05                   | (0.77 - 1.43)                  | 0.75           |
| Anti-TNF                           | 1.14                   | (0.89 - 1.46)                  | 0.31           |
| Anti-TNF + TP                      | 1.26                   | (0.87 - 1.83)                  | 0.22           |
| Anti-TNF + MTX                     | 0.90                   | (0.48 - 1.72)                  | 0.76           |
| Vedolizumab                        | 1.69                   | (1.16 - 2.48)                  | 0.007          |
| No IBD Meds                        | 1.01                   | (0.83 - 1.23)                  | 0.92           |

\* *Death from any non-COVID-19-related cause was treated as a competing event*
