# Supplementary material for: Risk factors for SARS-CoV-2 infection and course of COVID-19 disease in patients with IBD in the Veterans Affair Healthcare System
Source: HighWire-hosted journal article supplement (doi:10.1136/gutjnl-2021-324356), 2021-03-22

**Supplemental Figure 1 – Unadjusted Kaplan-Meier Curves for Development of COVID-19 Infection by (A) IBD Medication Category and (B) Corticosteroid Use**

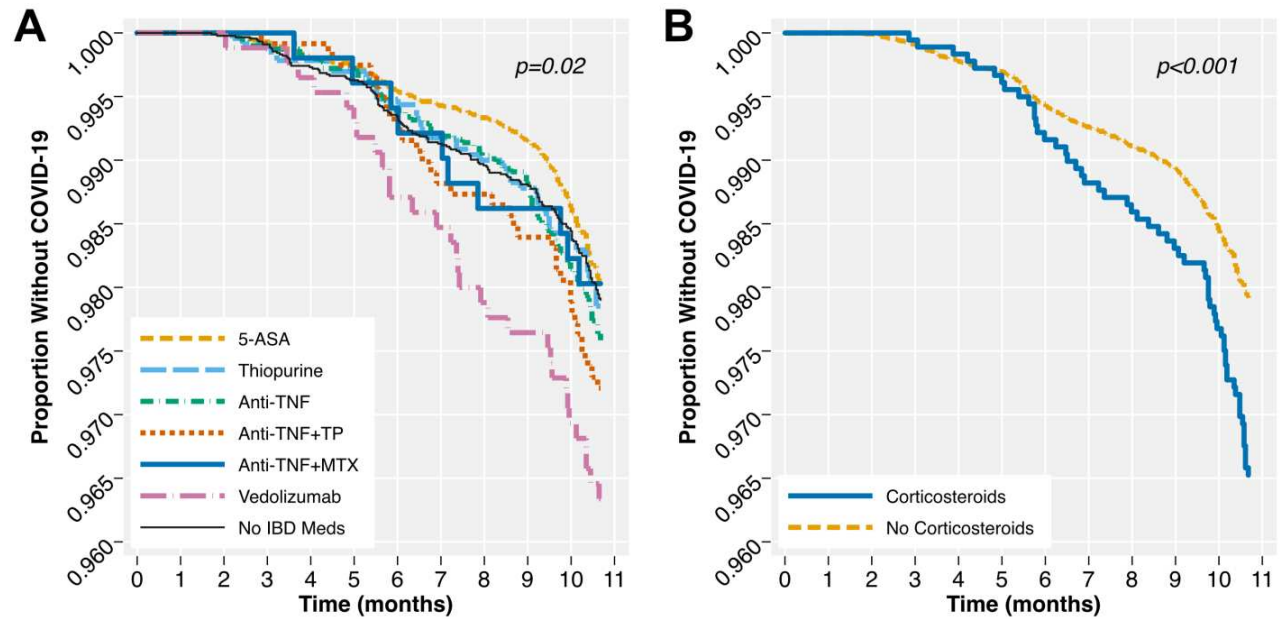

Supplement: gutjnl-2021-324356supp002_data_supplement.pdf [file gutjnl-2021-324356supp002_data_supplement.pdf]
